# Supplementary material for: Selective dehydrogenation of aromatic alcohols photocatalyzed by Pd-deposited CdS–TiO2in aqueous solution using visible light
Source: Royal Society of Chemistry journal article supplement (doi:10.1039/c2cy20607b), 2012-10-26
Supplement: c2cy20607b.pdf [file c2cy20607b.pdf]

# Selective dehydrogenation of aromatic alcohols photocatalyzed by Pd-deposited CdS-TiO<sub>2</sub> in aqueous solution using visible light

Shinya Higashimoto,<sup>\* a</sup> Yoshimi Tanaka,<sup>a</sup> Ryo Ishikawa,<sup>a</sup> Masashi Azuma,<sup>a</sup>

Hiroyoshi Ohue<sup>a</sup> and Yoshihisa Sakata<sup>b</sup>

<sup>a</sup> Department of Applied Chemistry, College of Engineering, Osaka Institute of Technology

5-16-1 Omiya, Asahi-ku, Osaka 535-8585, Japan

<sup>b</sup> Graduate School of Science and Engineering, Yamaguchi University

2-16-1 Tokiwadai, Ube 755-8611, Japan

Author E-mail address: [higashimoto@chem.oit.ac.jp](mailto:higashimoto@chem.oit.ac.jp) (Shinya Higashimoto)

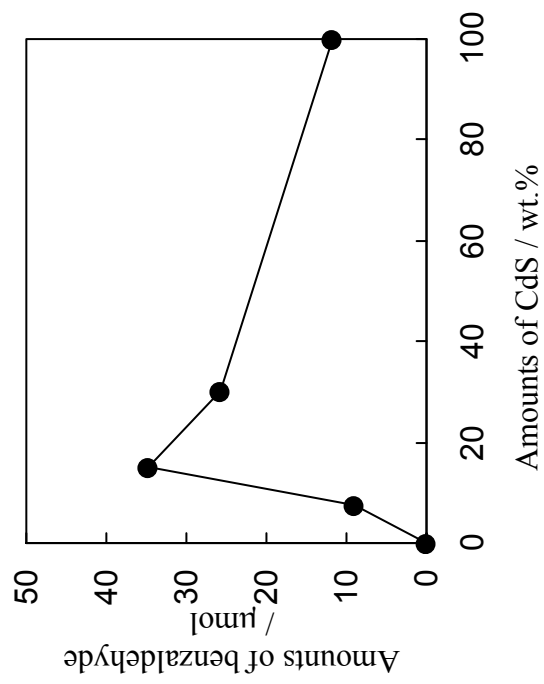

**Figure S1** Effect of CdS amounts ( $x$  wt.%) on the formation of benzaldehyde for the dehydrogenation of benzyl alcohol. Reaction conditions: 0.4Pd/ $x$ CdS-TiO<sub>2</sub> catalyst (50 mg); benzyl alcohol (50  $\mu\text{mol}$ ); argon (1 atm); blue LED ( $\lambda_{\text{max}} = 460$  nm, ca. 10 mW/cm<sup>2</sup>); reaction time (2h).

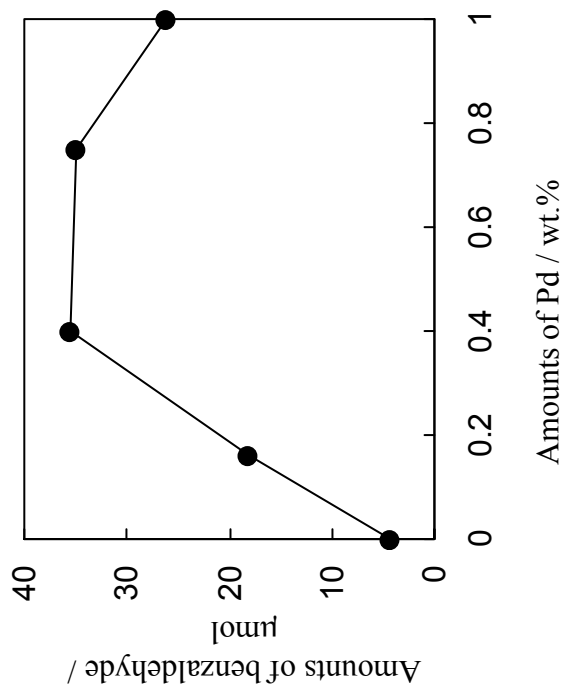

**Figure S2** Effect of Pd amounts ( $\gamma$  wt.%) on the formation of benzaldehyde for the dehydrogenation of benzyl alcohol. Reaction conditions:  $\gamma$ Pd/15CdS-TiO<sub>2</sub> catalyst (50 mg); benzyl alcohol (50  $\mu$ mol); argon (1 atm); blue LED ( $\lambda_{\text{max}} = 460$  nm, ca. 10 mW/cm<sup>2</sup>); reaction time (2h).

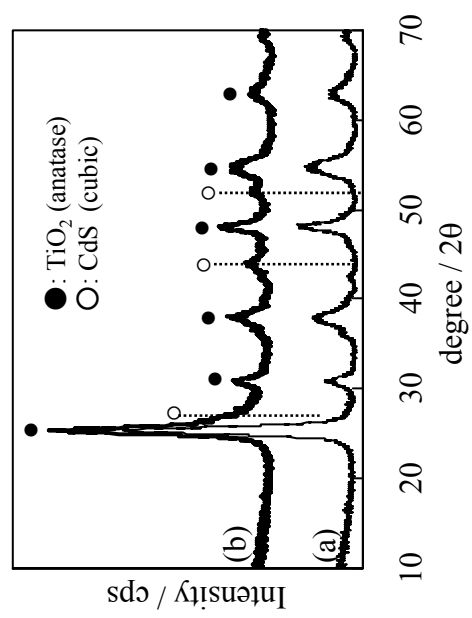

**Figure S3** XRD patterns of (a) TiO<sub>2</sub> and (b) 0.4Pd/15CdS-TiO<sub>2</sub>.

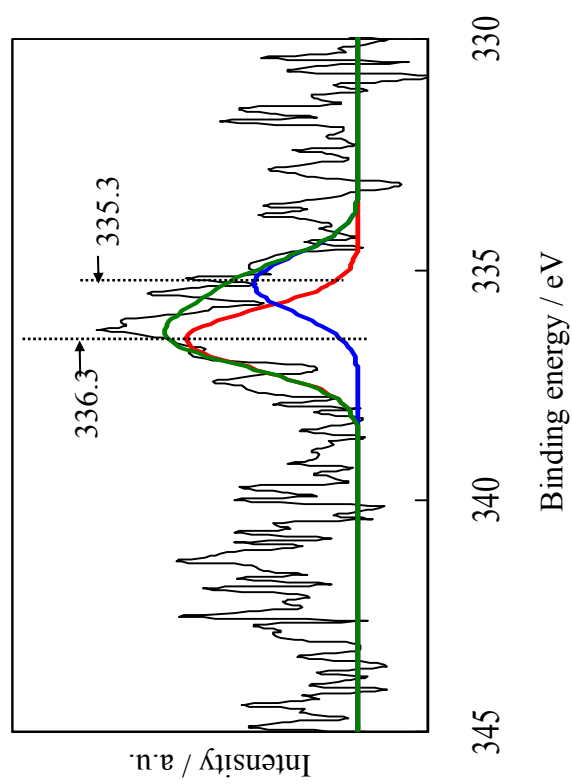

**Figure S4** XPS spectrum of the Pd 3d<sub>5/2</sub> peaks of 0.4Pd/15CdS-TiO<sub>2</sub>. The spectrum can be deconvoluted into two gauss functions peaked at 336.3 and 335.3 eV.
